# Supplementary material for: Emergence of Assortative Mixing between Clusters of Cultured Neurons
Source: PubMed Central journal article supplement (PMC4154651; doi:10.1371/journal.pcbi.1003796), 2014-09-04

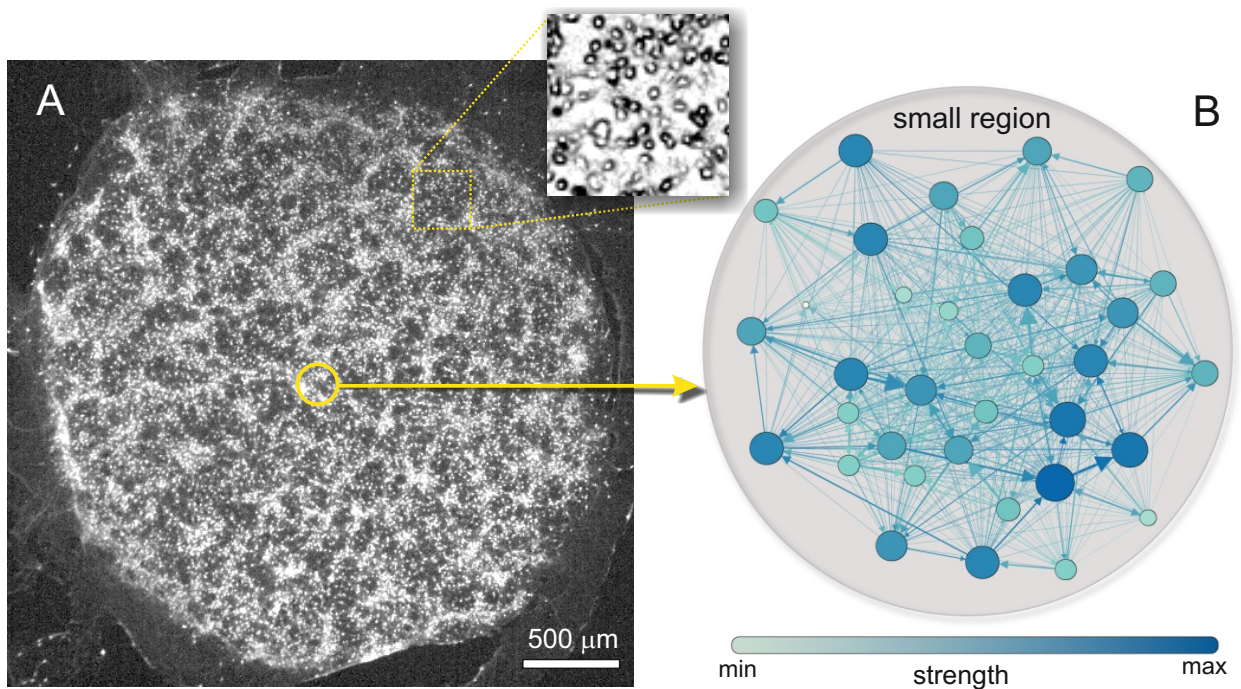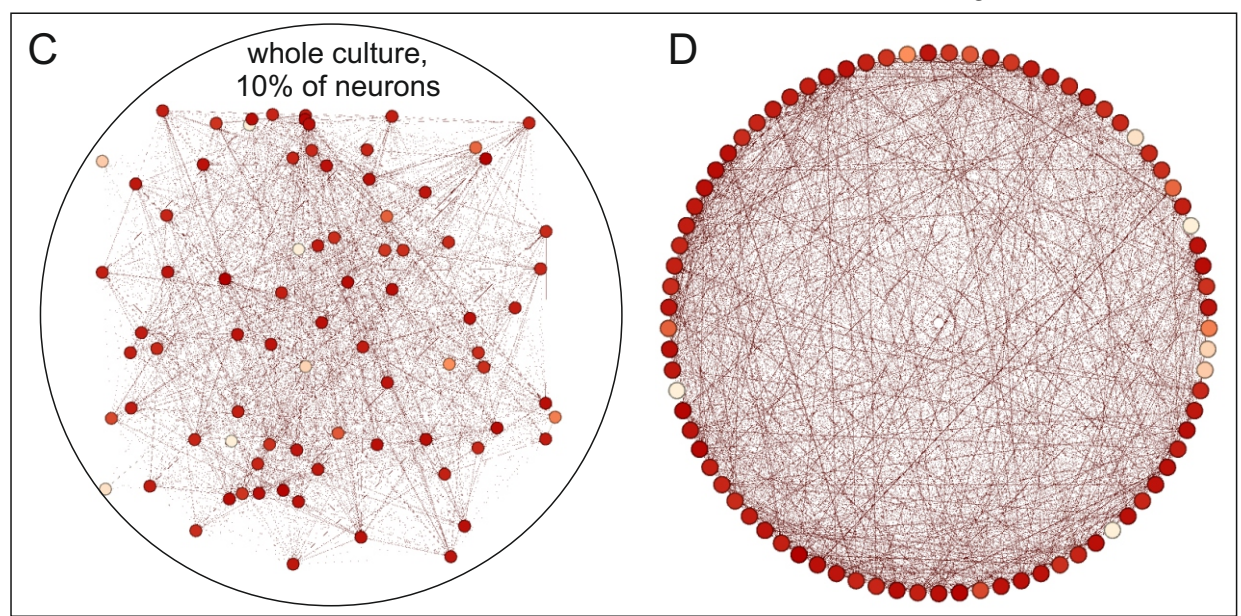

Supplement: pcbi.1003796.s001.pdf [file pcbi.1003796.s001.pdf]
