# Supplementary material for: Emergence of Assortative Mixing between Clusters of Cultured Neurons
Source: PubMed Central journal article supplement (PMC4154651; doi:10.1371/journal.pcbi.1003796), 2014-09-04

# Functional connectivity and physical connections

**A**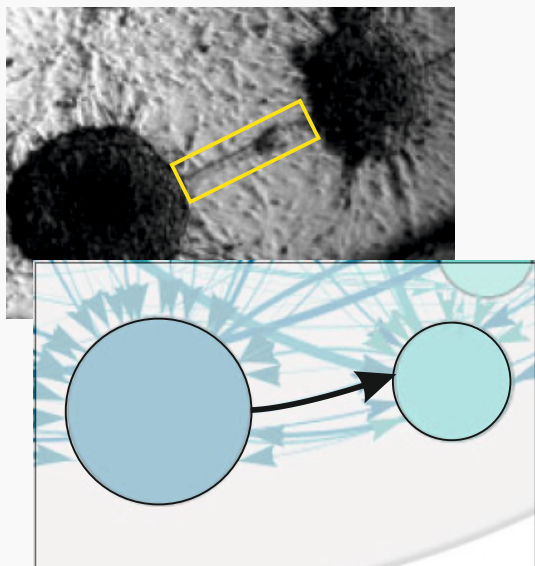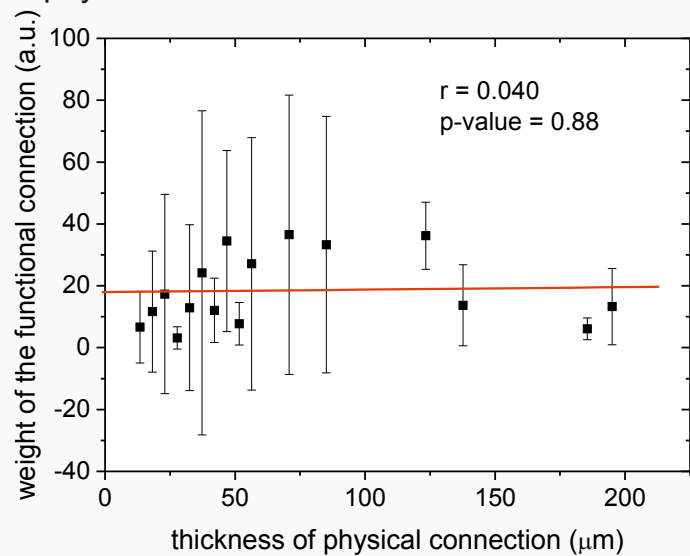

# Dependence of node strength and activity on cluster size

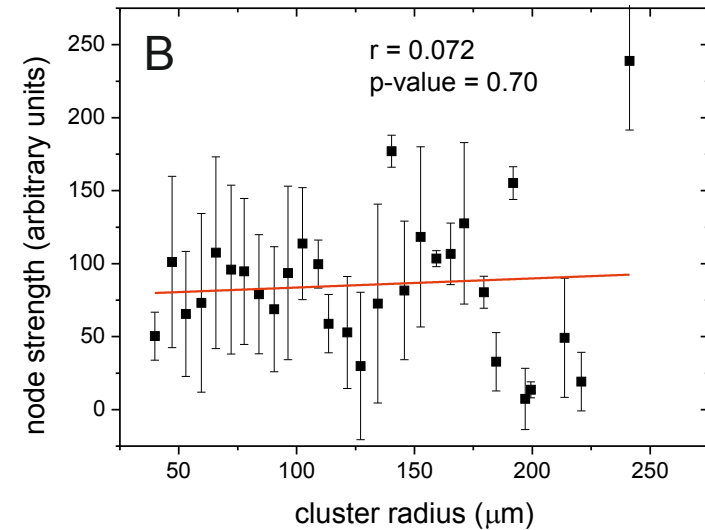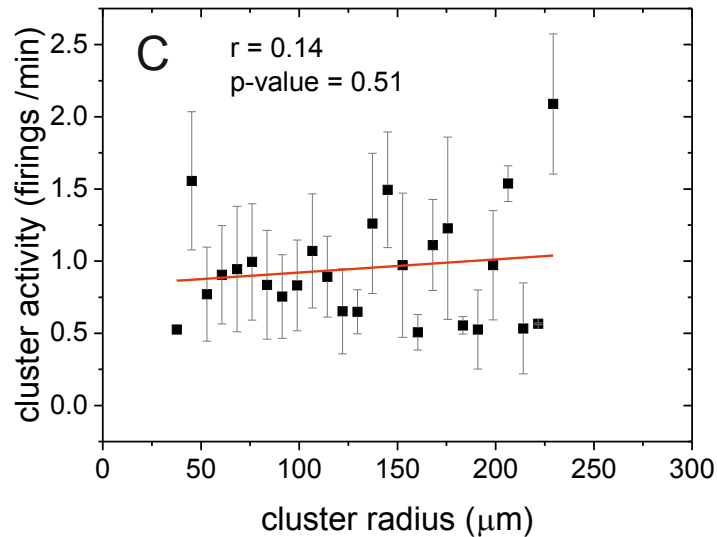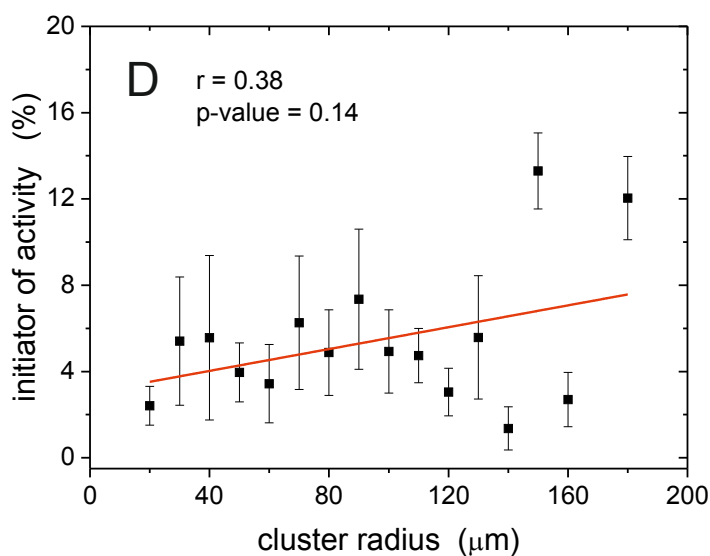

Supplement: pcbi.1003796.s004.pdf [file pcbi.1003796.s004.pdf]
