# Supplementary material for: Emergence of Assortative Mixing between Clusters of Cultured Neurons
Source: PubMed Central journal article supplement (PMC4154651; doi:10.1371/journal.pcbi.1003796), 2014-09-04

# Analysis of a 2h experiment in blocks of 40 min each

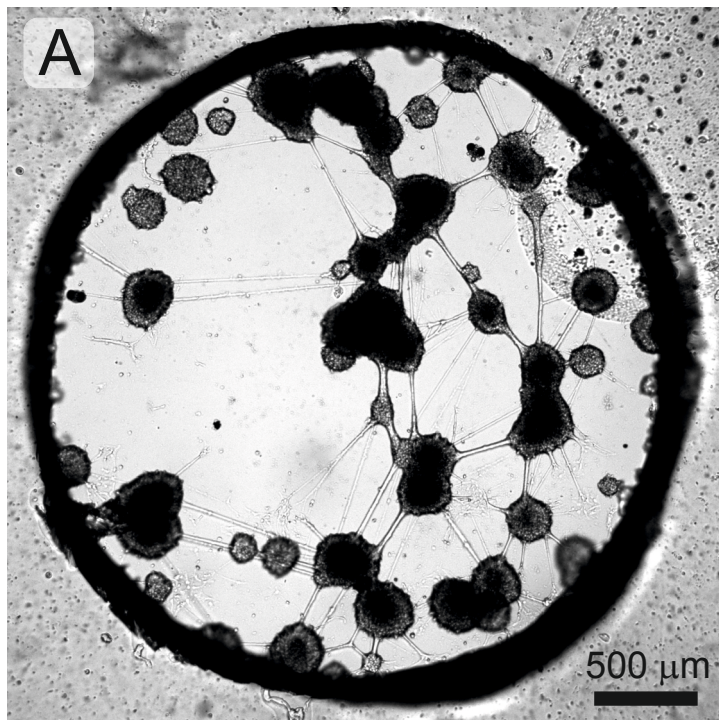

**B** Entire recording (2h):  $\rho = 0.40 \pm 0.07$

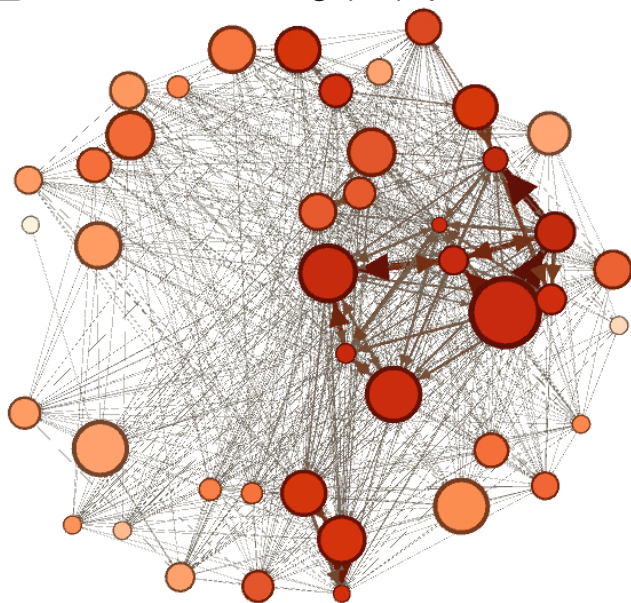

**C** Block 1:  $\rho = 0.44 \pm 0.07$

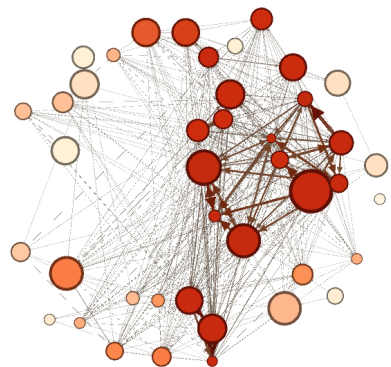

Block 2:  $\rho = 0.36 \pm 0.07$

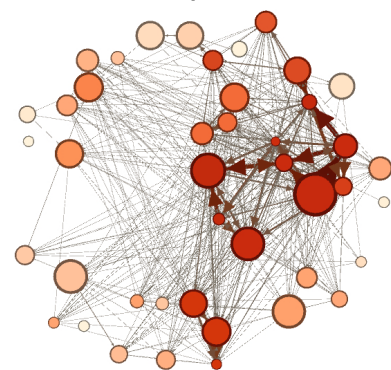

Block 3:  $\rho = 0.56 \pm 0.07$

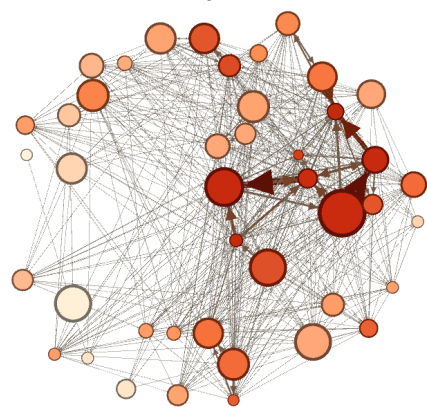

Supplement: pcbi.1003796.s006.pdf [file pcbi.1003796.s006.pdf]
